# Supplementary figures and images for: Endothelial cells express NKG2D ligands and desensitize antitumor NK responses
Source: eLife journal article supplement (doi:10.7554/elife.30881), 2017-12-12

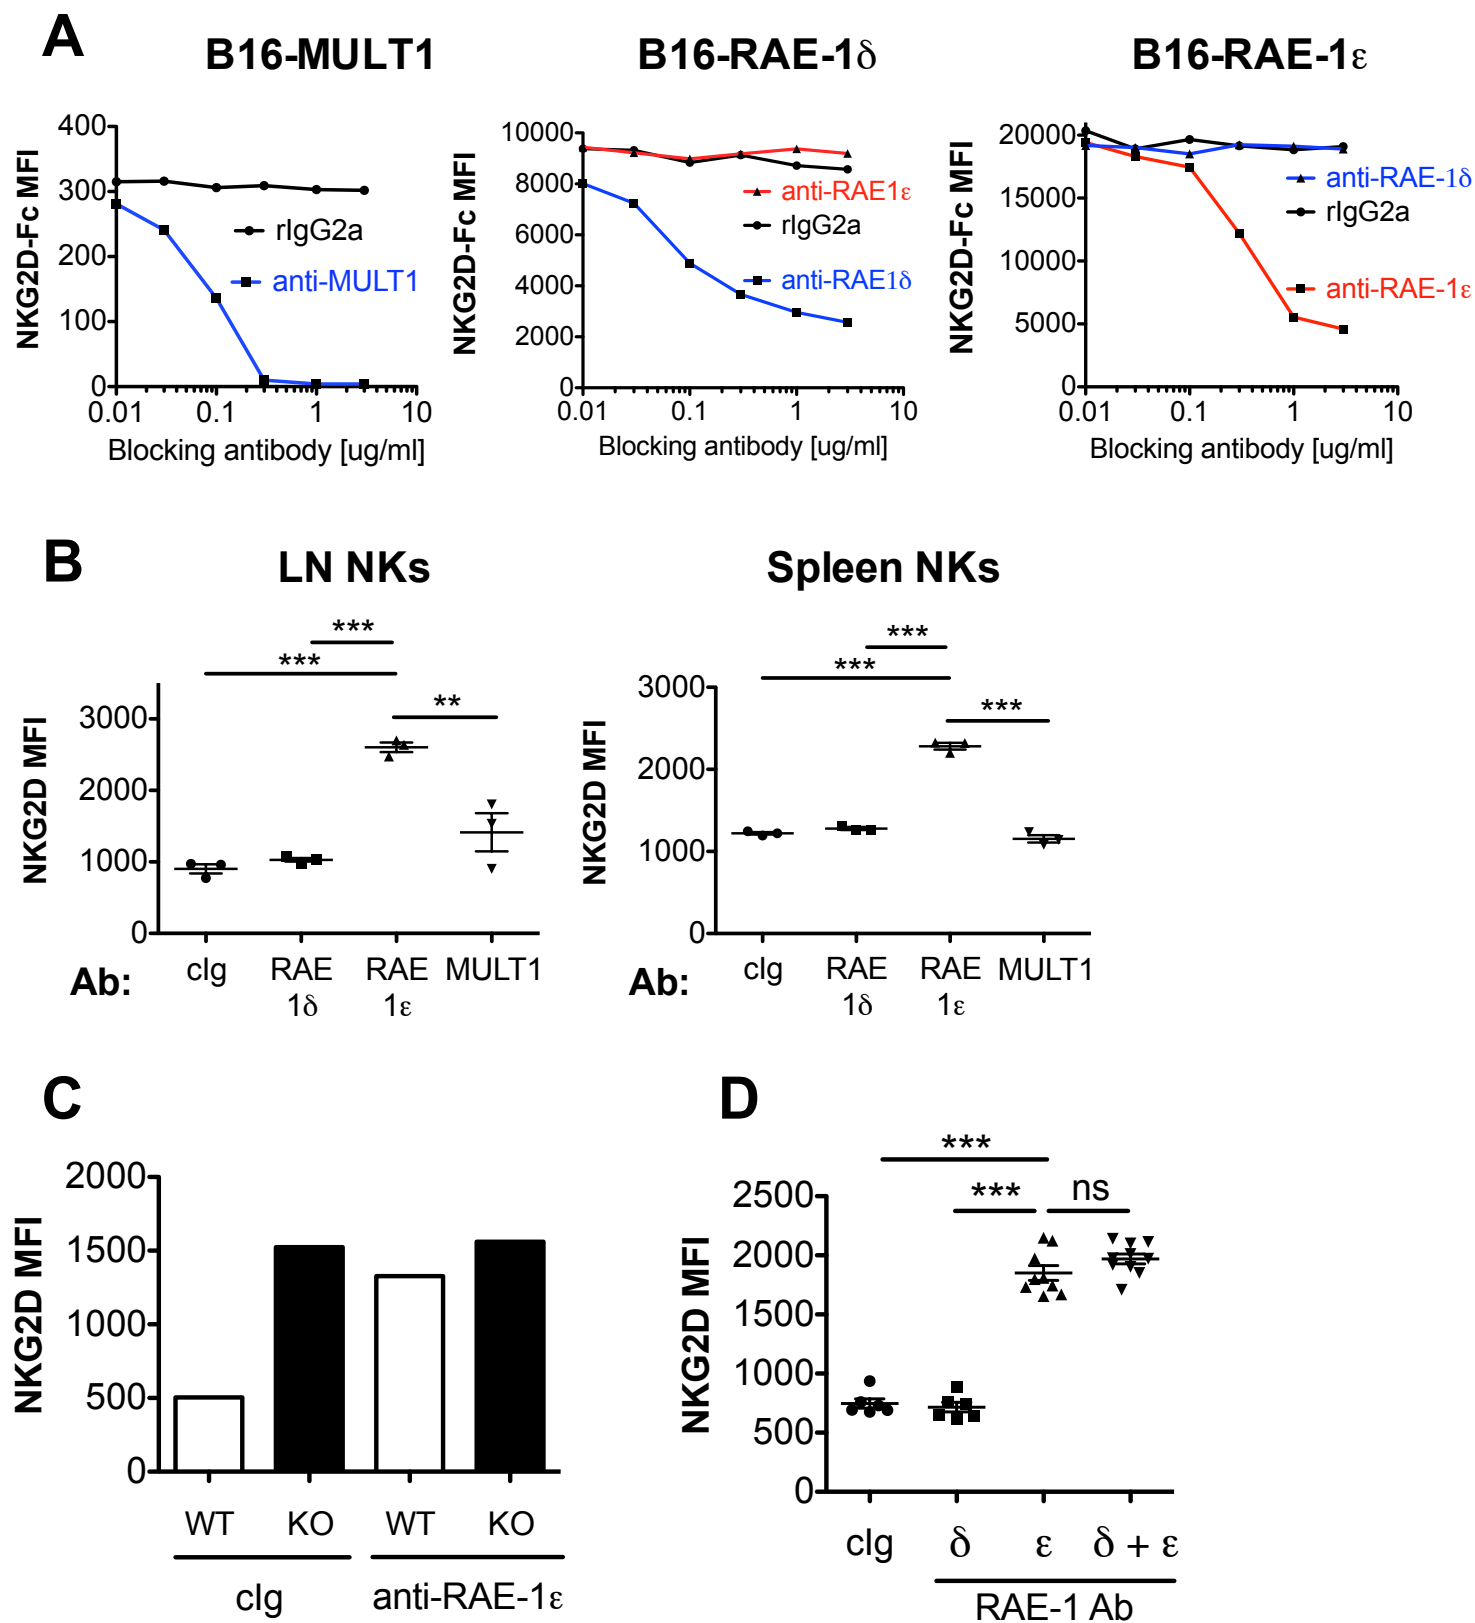

**Fig. 1 - Fig. Supplement 1**

Supplement: supp [file elife_poa_e30881_Figure_1_figure_supplement_1.pdf › elife_poa_e30881_Figure_1_figure_supplement_1.pdf]

**A**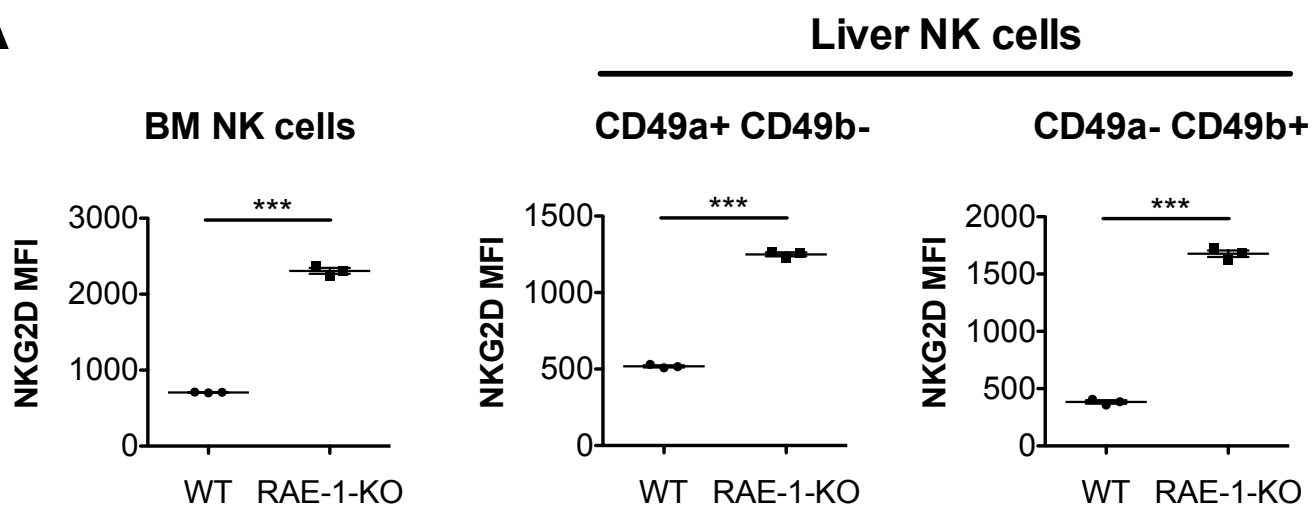

**Fig. 1 - Fig. Supplement 2**

Supplement: supp [file elife_poa_e30881_Figure_1_figure_supplement_2.pdf › elife_poa_e30881_Figure_1_figure_supplement_2.pdf]

# Spleen NKs

**A**

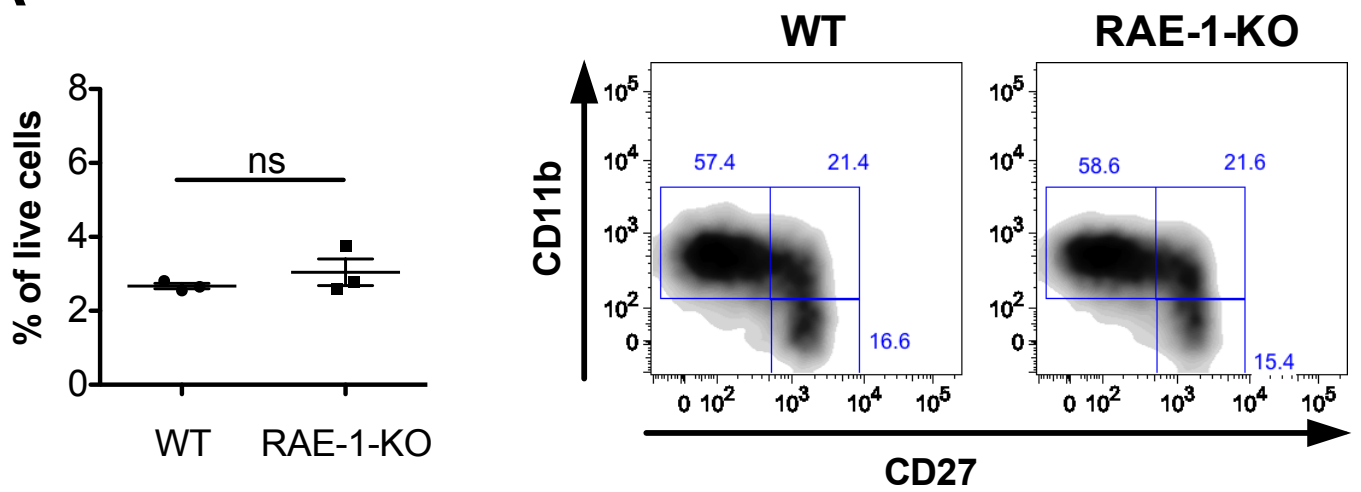

**B**

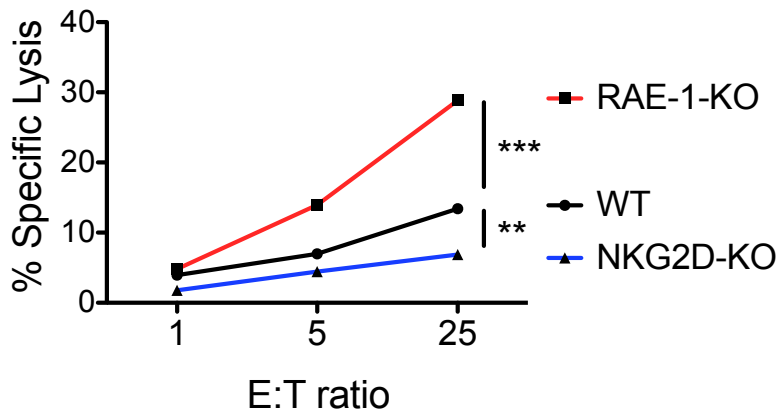

**Fig. 2 - Fig. Supplement 1**

Supplement: supp [file elife_poa_e30881_Figure_2_figure_supplement_1.pdf › elife_poa_e30881_Figure_2_figure_supplement_1.pdf]

**A**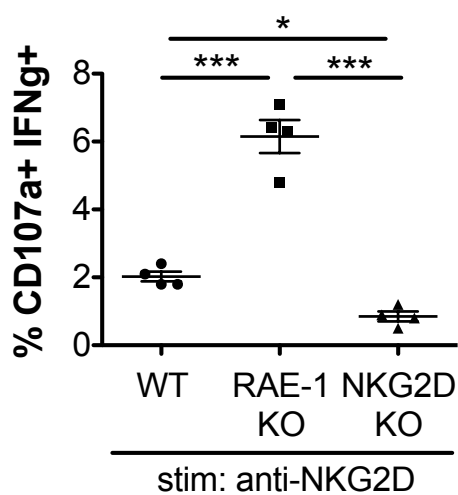**B**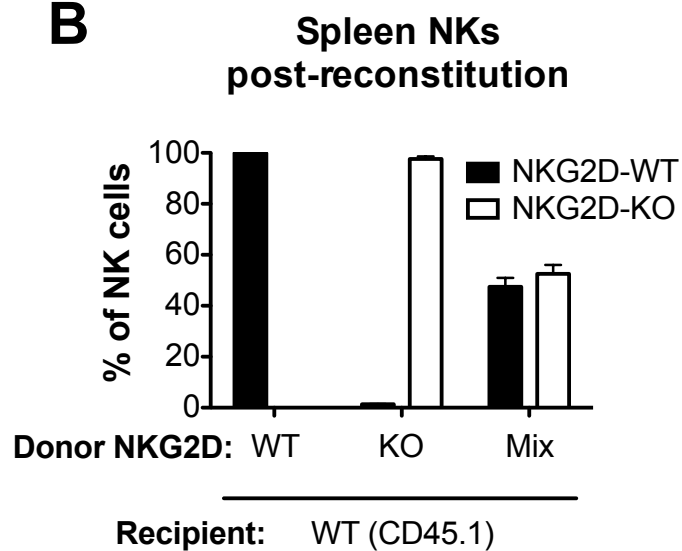**Fig. 3 - Fig. Supplement 1**

Supplement: supp [file elife_poa_e30881_Figure_3_figure_supplement_1.pdf › elife_poa_e30881_Figure_3_figure_supplement_1.pdf]

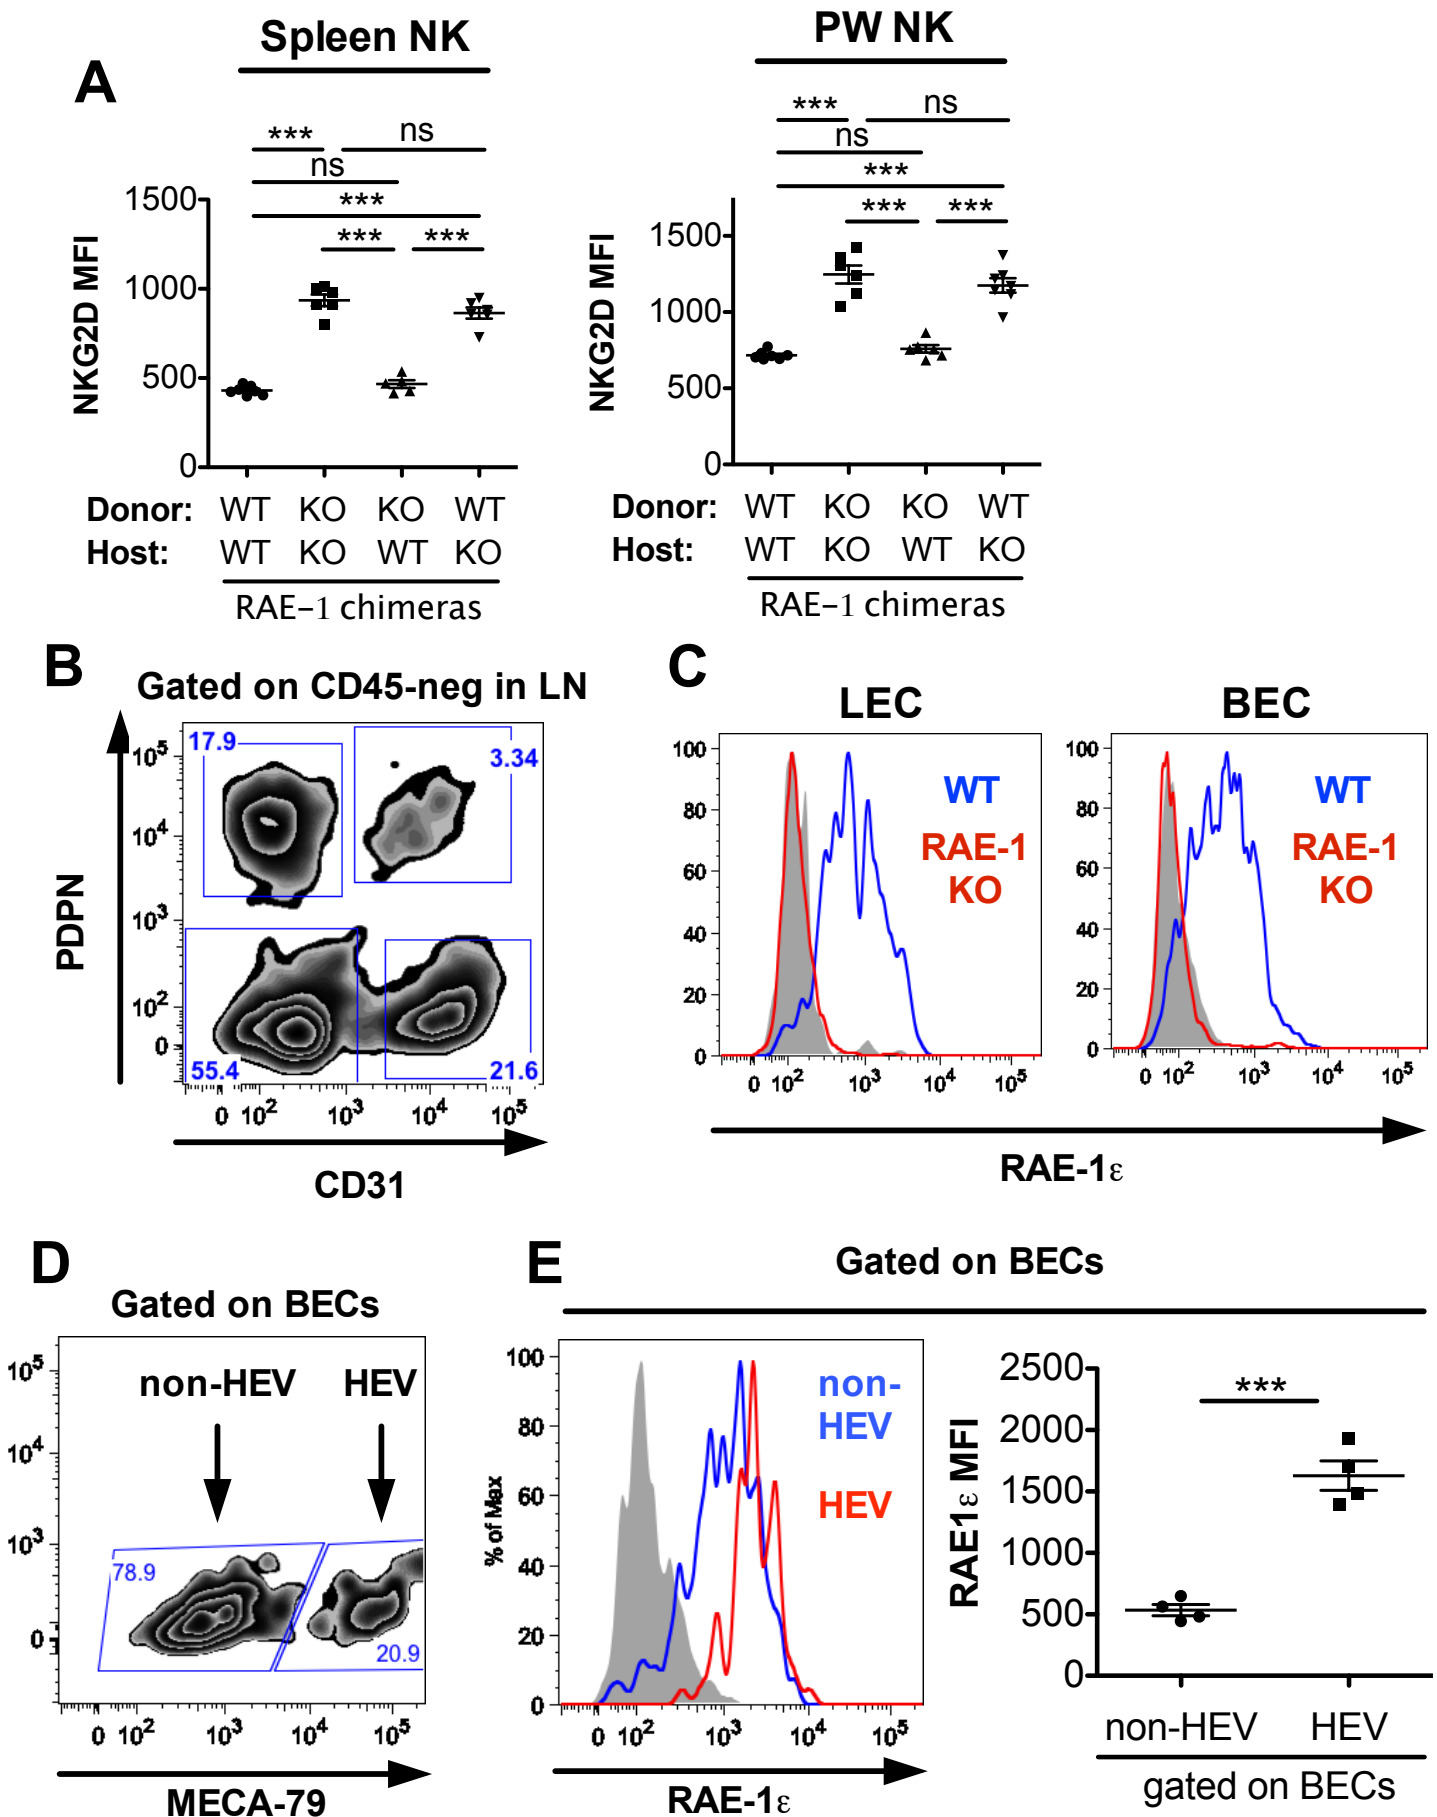

**Fig. 4 - Fig. Supplement 1**

Supplement: supp [file elife_poa_e30881_Figure_4_figure_supplement_1.pdf › elife_poa_e30881_Figure_4_figure_supplement_1.pdf]

**A**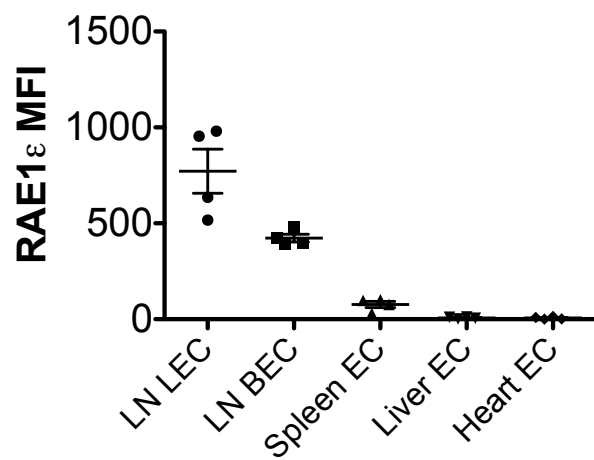**Fig. 4 - Fig. Supplement 2**

Supplement: supp [file elife_poa_e30881_Figure_4_figure_supplement_2.pdf › elife_poa_e30881_Figure_4_figure_supplement_2.pdf]

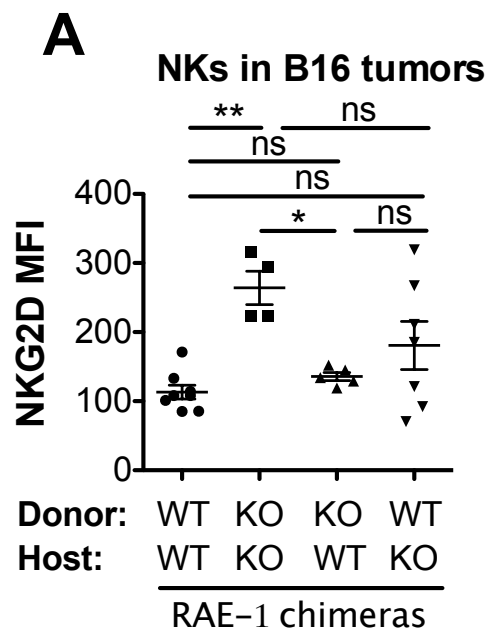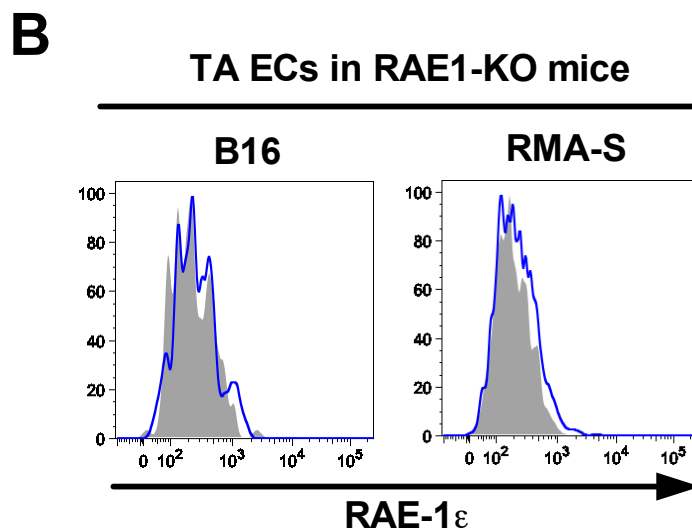

**Fig. 5 - Fig. Supplement 1**

Supplement: supp [file elife_poa_e30881_Figure_5_figure_supplement_1.pdf › elife_poa_e30881_Figure_5_figure_supplement_1.pdf]

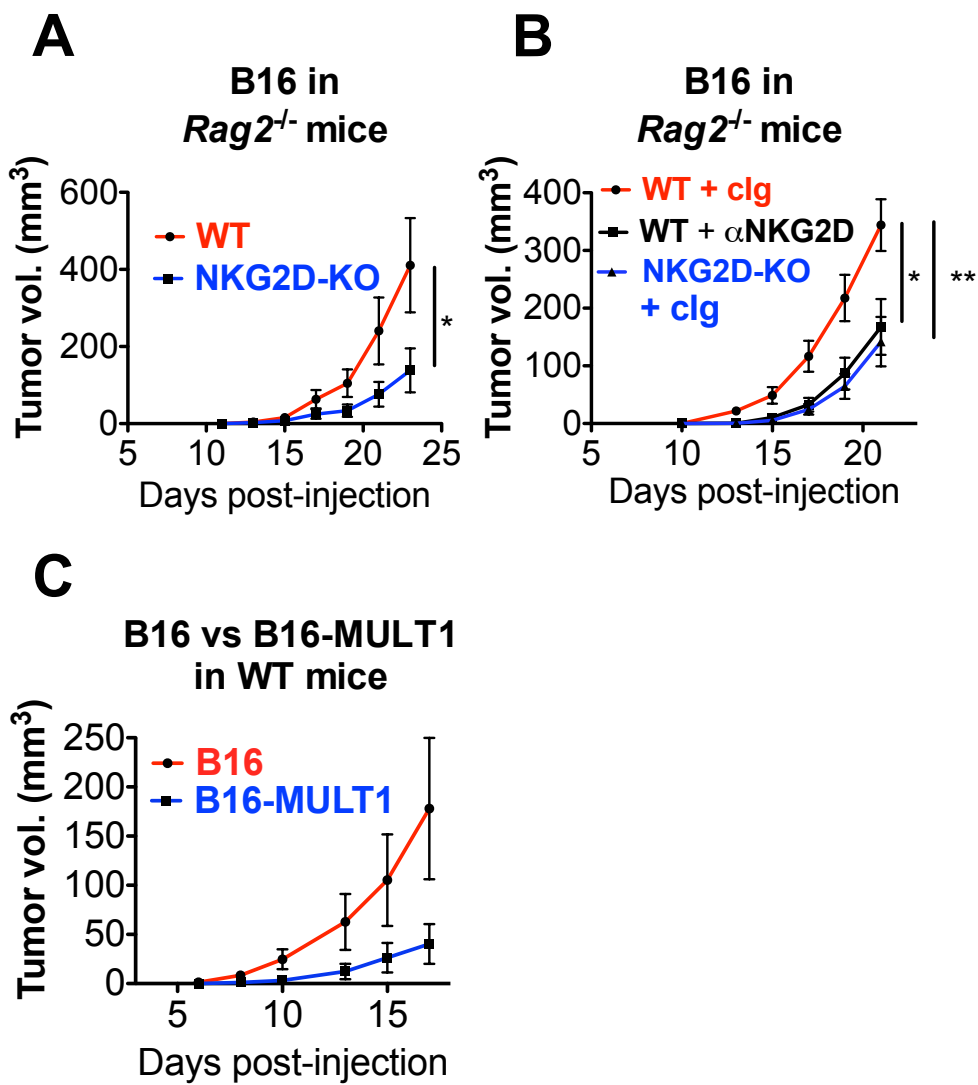

**Fig. 6 - Fig. Supplement 1**

Supplement: supp [file elife_poa_e30881_Figure_6_figure_supplement_1.pdf › elife_poa_e30881_Figure_6_figure_supplement_1.pdf]
